# Supplementary material
Source: publisher figshare collection journal article supplement (https://gsajournals.figshare.com/ndownloader/files/18303122)
Supplement: Supplementary file 1 [file 18303122]

## Sheet: Table1_Pval
Figure	Description	Statistical test	p-value
1B	CS (exposed vs unexposed)	Fishers Exact	0.0005212
1B	OreR (exposed vs unexposed)	Fishers Exact	1.767e-06
1C	Uninduced: Plasmatocytes (exposed vs unexposed)	students t-test	0.2509
1C	Uninduced: Podocytes (exposed vs unexposed)	students t-test	0.04338
1C	Uninduced: Lamellocytes (exposed vs unexposed)	students t-test	0.4752
1C	Induced: Plasmatocytes (exposed vs unexposed)	students t-test	0.3074
1C	Induced: Podocytes (exposed vs unexposed)	students t-test	0.07665
1C	Induced: Lamellocytes (exposed vs unexposed)	students t-test	0.003009
1D	Uninduced: Plasmatocytes (exposed vs unexposed)	students t-test	0.7794
1D	Uninduced: Podocytes (exposed vs unexposed)	students t-test	0.8833
1D	Uninduced: Lamellocytes (exposed vs unexposed)	students t-test	0.5404
1D	Induced: Plasmatocytes (exposed vs unexposed)	students t-test	0.2486
1D	Induced: Podocytes (exposed vs unexposed)	students t-test	0.03005
1D	Induced: Lamellocytes (exposed vs unexposed)	students t-test	1.78e-05
2E	zif (exposed vs unexposed)	students t-test	0.454
2E	promLike (exposed vs unexposed)	students t-test	0.6786
2E	Femcoat (exposed vs unexposed)	students t-test	0.002104
2E	cp16 (exposed vs unexposed)	students t-test	0.04362
2E	Nep2 (exposed vs unexposed)	students t-test	0.003896
2E	zelda (exposed vs unexposed)	students t-test	0.05727
2E	PGRP (exposed vs unexposed)	students t-test	0.007036
2E	Oamb (exposed vs unexposed)	students t-test	0.02367
2E	PkaR1 (exposed vs unexposed)	students t-test	0.2772
3E	cact (exposed vs unexposed)	students t-test	0.7364
3E	aldh3 (exposed vs unexposed)	students t-test	0.6249
3E	CG31661 (exposed vs unexposed)	students t-test	0.01144
3E	Femcoat (exposed vs unexposed)	students t-test	0.04117
3E	CG11710 (exposed vs unexposed)	students t-test	0.1672
3E	Oamb (exposed vs unexposed)	students t-test	0.09319
3E	Cp16 (exposed vs unexposed)	students t-test	0.0101
3E	cg (exposed vs unexposed)	students t-test	0.2306
4A	Uninduced: Plasmatocytes (PGRP-LB[RNAi] vs Gal4 control)	students t-test
4A	Uninduced: Podocytes (PGRP-LB[RNAi] vs Gal4 control)	students t-test
4A	Uninduced: Lamellocytes (PGRP-LB[RNAi] vs Gal4 control)	students t-test
4A	Induced: Plasmatocytes (PGRP-LB[RNAi] vs Gal4 control)	students t-test
4A	Induced: Podocytes (PGRP-LB[RNAi] vs Gal4 control)	students t-test
4A	Induced: Lamellocytes (PGRP-LB[RNAi] vs Gal4 control)	students t-test
4B	PGRP-LB[RNAi] vs Gal4 control	Fishers Exact	0.03603
4C	PGRP-LB[RNAi] vs Gal4 control	one-sample t-test	0.02573
4D	Uninduced: AttA (PGRP-LB[RNAi] vs Gal4 control)	students t-test
4D	Uninduced: AttB (PGRP-LB[RNAi] vs Gal4 control)	students t-test
4D	Uninduced: CecA1 (PGRP-LB[RNAi] vs Gal4 control)	students t-test
4D	Uninduced: DptA (PGRP-LB[RNAi] vs Gal4 control)	students t-test
4D	Uninduced: DptB (PGRP-LB[RNAi] vs Gal4 control)	students t-test
4D	Uninduced: Dro (PGRP-LB[RNAi] vs Gal4 control)	students t-test
4D	Induced: AttA (PGRP-LB[RNAi] vs Gal4 control)	students t-test
4D	Induced: AttB (PGRP-LB[RNAi] vs Gal4 control)	students t-test
4D	Induced: CecA1 (PGRP-LB[RNAi] vs Gal4 control)	students t-test
4D	Induced: DptA (PGRP-LB[RNAi] vs Gal4 control)	students t-test
4D	Induced: DptB (PGRP-LB[RNAi] vs Gal4 control)	students t-test
4D	Induced: Dro (PGRP-LB[RNAi] vs Gal4 control)	students t-test
S1	CS, Induced: Plasmatocytes (exposed vs unexposed)	students t-test	0.427
S1	CS, Induced: Podocytes (exposed vs unexposed)	students t-test	0.2616
S1	CS, Induced: Lamellocytes (exposed vs unexposed)	students t-test	0.8335
S1	OreR, Induced: Plasmatocytes (exposed vs unexposed)	students t-test	0.8215
S1	OreR, Induced: Podocytes (exposed vs unexposed)	students t-test	0.0653
S1	OreR, Induced: Lamellocytes (exposed vs unexposed)	students t-test	0.1635
S2B	exposed vs unexposed	one-sample t-test	0.03971
S3	AttA (exposed vs unexposed)	students t-test
S3	AttB (exposed vs unexposed)	students t-test	0.1746
S3	CecA1 (exposed vs unexposed)	students t-test
S3	DptA (exposed vs unexposed)	students t-test
S3	DptB (exposed vs unexposed)	students t-test
S3	Dro (exposed vs unexposed)	students t-test

## Sheet: Table2_S14s
Transcript ID	qval	b
FBtr0078891	1.55e-17	-7.40235
FBtr0330191	0.00159747	-5.29738
FBtr0345015	0.000671005	-5.20651
FBtr0307334	0.0017539	-4.57858
FBtr0337010	0.00163854	-4.47646
FBtr0072433	0.0168981	-4.46224
FBtr0304848	0.00637566	-4.12495
FBtr0070725	0.00319477	-4.09284
FBtr0339398	0.0112327	-4.03511
FBtr0332187	0.00399363	-3.86316
FBtr0073089	0.0156809	-3.44412
FBtr0087622	0.0188279	-3.44215
FBtr0334893	0.0427022	-3.418
FBtr0088142	0.0134514	-3.28833
FBtr0333486	0.0278924	-3.20197
FBtr0343652	0.0369285	-2.57392
FBtr0070099	0.00120412	-2.30338
FBtr0073294	0.0283699	-2.1212
FBtr0305599	0.000963551	-2.10004
FBtr0076574	0.00377476	-2.04146
FBtr0076571	0.0131144	-1.88113
FBtr0076573	0.00247255	-1.86405
FBtr0343888	5.02e-07	-1.75443
FBtr0332186	0.0462085	-1.73097
FBtr0088133	0.022088	-1.69487
FBtr0335245	0.0490936	-1.69116
FBtr0304630	0.000127801	-1.63781
FBtr0340399	5.54e-12	-1.60032
FBtr0344865	2.67e-05	-1.59174
FBtr0112636	0.000124514	-1.58861
FBtr0070663	8.35e-05	-1.58045
FBtr0340267	0.000565045	-1.55358
FBtr0305598	1.18e-05	-1.54779
FBtr0334817	1.25e-05	-1.54514
FBtr0077931	3.54e-06	-1.54396
FBtr0305283	2.06e-05	-1.516
FBtr0081240	0.0020153	-1.48783
FBtr0081242	3.74e-05	-1.45706
FBtr0079148	0.000758157	-1.44544
FBtr0307062	0.0022809	-1.43235
FBtr0077932	8.01e-06	-1.42766
FBtr0080139	0.000235199	-1.42721
FBtr0071610	0.0013613	-1.40544
FBtr0076572	0.000420776	-1.39812
FBtr0336935	2.51e-05	-1.39486
FBtr0075801	0.00195182	-1.36706
FBtr0077929	2.66e-06	-1.35573
FBtr0345746	1.96e-07	-1.35516
FBtr0070284	0.00550922	-1.3545
FBtr0086963	0.0351868	-1.33641
FBtr0089761	0.0157328	-1.30139
FBtr0301512	0.00482882	-1.29884
FBtr0336857	7.64e-05	-1.28308
FBtr0310569	1.46e-05	-1.27661
FBtr0088141	0.00143263	-1.27109
FBtr0073296	1.9e-07	-1.26737
FBtr0309992	0.00144552	-1.26346
FBtr0305133	0.00130259	-1.25714
FBtr0088474	0.00754263	-1.23857
FBtr0078557	0.00117198	-1.2085
FBtr0078343	0.0368748	-1.20663
FBtr0072148	0.0200409	-1.20568
FBtr0330254	0.0200409	-1.20568
FBtr0071785	0.00126744	-1.16262
FBtr0080520	0.00584055	-1.16116
FBtr0073295	2.51e-05	-1.13507
FBtr0308034	1.6e-05	-1.11848
FBtr0085217	2.15e-08	-1.07196
FBtr0339324	6.42e-05	-1.06912
FBtr0088218	5.85e-06	-1.06133
FBtr0082092	0.000491916	-1.0489
FBtr0075811	1.52e-05	-1.04701
FBtr0100009	0.00915613	-1.02594
FBtr0085070	0.000684598	-1.02544
FBtr0329850	0.00229657	-1.02042
FBtr0346002	0.000328665	-1.0166
FBtr0076050	0.00575619	-1.01015
FBtr0339325	0.00130065	-0.996153
FBtr0336617	0.00611138	-0.99448
FBtr0309197	0.00160074	-0.98965
FBtr0305600	0.000373466	-0.984875
FBtr0073911	0.000192349	-0.984063
FBtr0332461	0.043925	-0.979751
FBtr0333277	0.00742965	-0.977781
FBtr0079534	4.67e-09	-0.968206
FBtr0334924	0.000603024	-0.959033
FBtr0302972	2.13e-06	-0.954397
FBtr0081068	0.000889216	-0.940564
FBtr0100430	0.00307873	-0.932649
FBtr0082487	0.0326982	-0.928808
FBtr0343669	3.18e-06	-0.923047
FBtr0307064	0.015368	-0.91977
FBtr0071784	0.0448888	-0.916317
FBtr0079466	7.95e-06	-0.911283
FBtr0342936	0.0295122	-0.907055
FBtr0079374	1.25e-05	-0.900656
FBtr0347224	0.013728	-0.900333
FBtr0300193	0.0220565	-0.893611
FBtr0302147	0.0109507	-0.893155
FBtr0079864	0.000106292	-0.891829
FBtr0088486	0.00452156	-0.888514
FBtr0083933	2.13e-07	-0.875372
FBtr0330712	2.13e-07	-0.875372
FBtr0082833	2.99e-08	-0.874511
FBtr0305282	4.35e-08	-0.868535
FBtr0273399	3.74e-05	-0.862556
FBtr0112576	3.54e-06	-0.843533
FBtr0333685	3.54e-06	-0.843533
FBtr0340018	0.0166425	-0.842199
FBtr0346244	0.0425272	-0.840368
FBtr0082124	0.00130065	-0.840212
FBtr0075204	0.043925	-0.838073
FBtr0347200	0.00142303	-0.837422
FBtr0345378	0.00146976	-0.829638
FBtr0112979	0.00171316	-0.823224
FBtr0335276	0.00311948	-0.804215
FBtr0344173	0.00937594	-0.803412
FBtr0082396	0.000128515	-0.800644
FBtr0086320	4.36e-06	-0.796623
FBtr0339707	2.67e-05	-0.79272
FBtr0333686	1.18e-05	-0.790277
FBtr0310561	0.00522911	-0.789817
FBtr0089939	0.0195433	-0.788684
FBtr0299610	2.51e-05	-0.78664
FBtr0346006	0.00950708	-0.785344
FBtr0346003	0.00686632	-0.778357
FBtr0113061	0.047406	-0.774789
FBtr0088073	1.48e-06	-0.774629
FBtr0085496	7.24e-06	-0.769505
FBtr0080527	2.27e-06	-0.766421
FBtr0330025	2.87e-05	-0.764932
FBtr0304867	5.58e-06	-0.763577
FBtr0079533	0.0194072	-0.762126
FBtr0088501	0.0419172	-0.757946
FBtr0304047	0.00934767	-0.757327
FBtr0302355	0.0487352	-0.752288
FBtr0305157	9.62e-06	-0.748533
FBtr0339544	3.65e-06	-0.748088
FBtr0073292	0.000172661	-0.743092
FBtr0330644	3.32e-06	-0.737239
FBtr0073377	0.00357321	-0.731146
FBtr0112577	0.00248168	-0.725632
FBtr0345960	0.0355044	-0.723442
FBtr0343282	0.000105459	-0.721274
FBtr0100860	0.0248614	-0.714469
FBtr0304844	0.000597633	-0.714067
FBtr0074028	0.00095101	-0.713849
FBtr0302354	0.0355044	-0.709957
FBtr0346376	0.00253891	-0.700701
FBtr0077426	0.00266011	-0.70015
FBtr0342885	0.0362504	3.91376

## Sheet: Table3_S14e
Transcript	Gene	FBgn	logFC	FDR
Pka-R1_7	Pka-R1	FBgn0259243	-9.87561	9.08e-10
prominin-like_1	prominin-like	FBgn0026189	-8.53825	0.0365928
RhoGAP19D_2	RhoGAP19D	FBgn0031118	-7.85141	5.67e-10
AdamTS-A_3	AdamTS-A	FBgn0038341	-5.98182	3e-08
Nep2_3	Nep2	FBgn0027570	-3.92087	0.0229198
CG34141_3	CG34141	FBgn0083977	-2.96086	5.06e-07
Mur11Da_1	Mur11Da	FBgn0052644	-2.80624	0.00103809
Cp18_1	Cp18	FBgn0000357	-2.73714	2.36e-08
Nep2_2	Nep2	FBgn0027570	-2.65605	1.93e-08
Cyp4g1_1	Cyp4g1	FBgn0010019	-2.53089	0.000344113
CG43050_1	CG43050	FBgn0262352	-2.40487	0.0271176
comm3_1	comm3	FBgn0259236	-2.38381	7.33e-05
Cp16_1	Cp16	FBgn0000356	-2.25461	6.55e-05
Nos_1	Nos	FBgn0011676	-2.21313	0.000717601
CG12177_3	CG12177	FBgn0030510	-2.18776	1.94e-07
Femcoat_1	Femcoat	FBgn0041252	-2.15421	1.92e-12
CG3168_1	CG3168	FBgn0029896	-2.14646	1.67e-07
Epac_3	Epac	FBgn0085421	-2.14632	9.92e-06
Tusp_3	Tusp	FBgn0039530	-2.09771	0.000237786
CG32642_2	CG32642	FBgn0052642	-2.07714	3.78e-11
CG43135_1	CG43135	FBgn0262609	-2.04623	0.00363194
CG31928_2	CG31928	FBgn0051928	-2.0381	3.03e-13
Cp19_1	Cp19	FBgn0000358	-2.02284	0.000188336
CG31926_2	CG31926	FBgn0051926	-2.0181	4.7e-09
CG6508_1	CG6508	FBgn0032303	-2.01455	2.42e-10
CG13083_1	CG13083	FBgn0032789	-1.89591	1.21e-10
Mur2B_3	Mur2B	FBgn0025390	-1.88073	0.0270382
CG13084_1	CG13084	FBgn0032788	-1.86485	9.21e-08
Cp15_1	Cp15	FBgn0000355	-1.85078	4.91e-08
CG31928_1	CG31928	FBgn0051928	-1.8377	2.9e-06
Mur2B_1	Mur2B	FBgn0025390	-1.82271	0.0108407
CG1698_2	CG1698	FBgn0033443	-1.82266	7.49e-07
slif_3	slif	FBgn0037203	-1.80954	8.33e-10
CG11537_1	CG11537	FBgn0035400	-1.76721	0.033762
Gpdh_2	Gpdh	FBgn0001128	-1.76409	0.0274515
cv-2_1	cv-2	FBgn0000395	-1.76105	0.033762
Drip_6	Drip	FBgn0015872	-1.73208	8.11e-05
DOR_5	DOR	FBgn0035542	-1.65302	0.00010148
hebe_3	hebe	FBgn0033448	-1.62014	0.013267
Epac_2	Epac	FBgn0085421	-1.58282	0.0142945
CG31661_1	CG31661	FBgn0051661	-1.57472	0.000188336
Mco1_2	Mco1	FBgn0032116	-1.55778	0.035095
DOR_7	DOR	FBgn0035542	-1.52377	0.000236902
Acsl_6	Acsl	FBgn0263120	-1.47516	0.000188336
CG42708_10	CG42708	FBgn0261625	-1.47389	0.0297989
Unc-115a_3	Unc-115a	FBgn0051352	-1.43291	0.00409543
hebe_4	hebe	FBgn0033448	-1.36661	0.00134449
CG9932_1	CG9932	FBgn0262160	-1.36658	1.82e-06
CG12880_1	CG12880	FBgn0046258	-1.35169	0.033762
sgg_12	sgg	FBgn0003371	-1.3373	0.026983
CG15721_1	CG15721	FBgn0030438	-1.32772	9.21e-08
CG6928_2	CG6928	FBgn0036240	-1.31518	0.0110563
mamo_6	mamo	FBgn0267033	-1.31227	0.0108407
Swim_1	Swim	FBgn0034709	-1.28858	0.0220782
CG32369_1	CG32369	FBgn0052369	-1.28743	0.00816916
CG10178_1	CG10178	FBgn0032684	-1.26378	0.033762
DOR_6	DOR	FBgn0035542	-1.20084	0.00698797
Tg_1	Tg	FBgn0031975	-1.18897	4.16e-08
drd_1	drd	FBgn0260006	-1.15904	0.0181882
AdamTS-A_1	AdamTS-A	FBgn0038341	-1.15448	0.00753387
CG8399_2	CG8399	FBgn0034067	-1.15203	0.0142945
Oamb_5	Oamb	FBgn0024944	-1.14356	0.000717601
Src42A_1	Src42A	FBgn0264959	-1.14215	0.000128249
CG5958_1	CG5958	FBgn0031913	-1.12763	2.13e-06
fog_4	fog	FBgn0000719	-1.12513	0.00869843
Muc12Ea_1	Muc12Ea	FBgn0052602	-1.104	0.00539047
Oamb_2	Oamb	FBgn0024944	-1.09728	0.00120071
Sirup_2	Sirup	FBgn0031971	-1.09723	0.00106488
Smg5_3	Smg5	FBgn0019890	-1.09475	0.000647698
CG42708_3	CG42708	FBgn0261625	-1.09416	0.000821873
IP3K2_2	IP3K2	FBgn0266375	-1.09117	0.0014366
Tg_2	Tg	FBgn0031975	-1.0788	0.0110563
mthl1_1	mthl1	FBgn0030766	-1.06673	0.0124658
RhoL_2	RhoL	FBgn0014380	-1.04581	0.0297989
plx_2	plx	FBgn0261261	-1.04541	1.21e-10
Men_1	Men	FBgn0002719	-1.04432	3.97e-07
CG13117_1	CG13117	FBgn0032140	-1.04051	0.0278705
CR42862_3	CR42862	FBgn0262109	-1.01897	0.0123136
for_8	for	FBgn0000721	-1.01207	0.0226407
CG31038_2	CG31038	FBgn0051038	-1.00939	0.0260187
CG9864_2	CG9864	FBgn0034490	-1.00549	3.54e-08
Nf1_3	Nf1	FBgn0015269	5.01986	0.00106488
Gpo-1_3	Gpo-1	FBgn0022160	6.51719	0.0275272
CG4733_4	CG4733	FBgn0038744	7.8792	0.033007
CG17612_1	CG17612	FBgn0031597	8.13523	0.0143966
vfl_5	vfl	FBgn0259789	8.38076	0.0275272

## Sheet: Table4_Os
Transcript ID	qval	b
FBtr0076574	0.0417359	-1.13335
FBtr0077932	0.00498861	-1.41129
FBtr0083934	0.0369196	-3.73296
FBtr0290035	0.00584486	5.15226
FBtr0305599	0.0237581	-0.975503
FBtr0339325	0.0237581	-1.09151
FBtr0343578	0.0189975	-5.50035

## Sheet: Table5_Oe
Gene/Transcript	logFC	FDR
Aldh-III_8	-8.05698	0.0464667
gem_2	-7.18277	0.000130815
Lerp_2	-6.69521	0.00214619
cact_1	-5.99559	0.00134996
CG32642_1	-2.45068	0.0472517
Calx_4	-2.11334	0.00635991
CG31661_1	-1.95839	3.34e-06
Cp16_1	-1.5596	3.8e-05
Cnot4_4	-1.55053	0.00635991
CG31928_1	-1.46211	0.0337583
Cp19_1	-1.32079	0.0018038
Mur11Da_1	-1.30698	0.0225765
CG31926_2	-1.16258	0.0430367
Femcoat_1	-1.12267	0.0215348
l(3)76BDm_2	-1.06792	0.0246041
CG10249_6	1.00779	0.0256358
CG43693_6	1.01726	0.0195083
sd_7	1.04293	0.0246041
PMCA_1	1.19566	0.00134996
cg_6	1.59567	0.0171479
mts_2	1.83812	0.00319121
CG9932_4	3.85066	0.000236907
Doa_13	4.13846	0.0370463
srp_2	6.05504	0.0256358
CG11710_1	7.84144	0.00544173
Sema-2a_4	8.53612	0.000196608

## Sheet: Table6_stocks
Species	Strain	genotype	Source
D. melanogaster	Canton S (CS)	wild type	Bosco Lab
D. melanogaster	Oregan R (OreR)	wild type	Bosco Lab
D. melanogaster	Genome Strain	wild type	Drosophila species stock center (14021-0231.36)
D. melanogaster	UAS-PGRP-LB[RNAi]	y[1] sc[*] v[1]; P{y[+t7.7] v[+t1.8]=TRiP.HMC06337}attP40	Bloomington (67236)
D. melanogaster	Matα-Gal4	w[*]; P{w[+mC]=matalpha4-GAL-VP16}V2H	Bloomington (7062)
L. heterotoma	Lh14	wild type	Schlenke Lab
L. victoriae	Lv Phil	wild type	Schlenke Lab

## Sheet: Table7_primers
Actin FP
Actin RP
